# Supplementary material for: Regulating through space charge transfer in thermally activated delayed fluorescence moleculesviadonor architectures: theoretical perspective and molecular design
Source: Royal Society of Chemistry journal article supplement (doi:10.1039/d2cp05848k), 2023-01-01
Supplement: d2cp05848k1.pdf [file d2cp05848k1.pdf]

## *Supplementary Information*

# Regulating through space charge transfer in thermally activated delayed fluorescence molecules via donor architectures: Theoretical perspective and molecular design

Xiaorui Wang<sup>1#</sup>, Haipei Zou<sup>1#</sup>, Huanling Liu<sup>1</sup>, Qingfang Mu<sup>1</sup>, Kai Zhang<sup>1</sup>, Yuanyuan Xu,<sup>2\*</sup> Jianzhong Fan<sup>1,3\*</sup>

1. Shandong Province Key Laboratory of Medical Physics and Image Processing Technology, Institute of Materials and Clean Energy, School of Physics and Electronics, Shandong Normal University, Jinan 250014, China.
2. School of Science, Qilu University of Technology (Shandong Academy of Sciences), Jinan 250353, China.
3. Guangdong Provincial Key Laboratory of Luminescence from Molecular Aggregates (South China University of Technology), Guangzhou 510640, China.

### **Corresponding Author**

\*Author to whom correspondence should be addressed.

E-mail: [fanjianzhongvip@163.com](mailto:fanjianzhongvip@163.com) and [15165131990@163.com](mailto:15165131990@163.com)

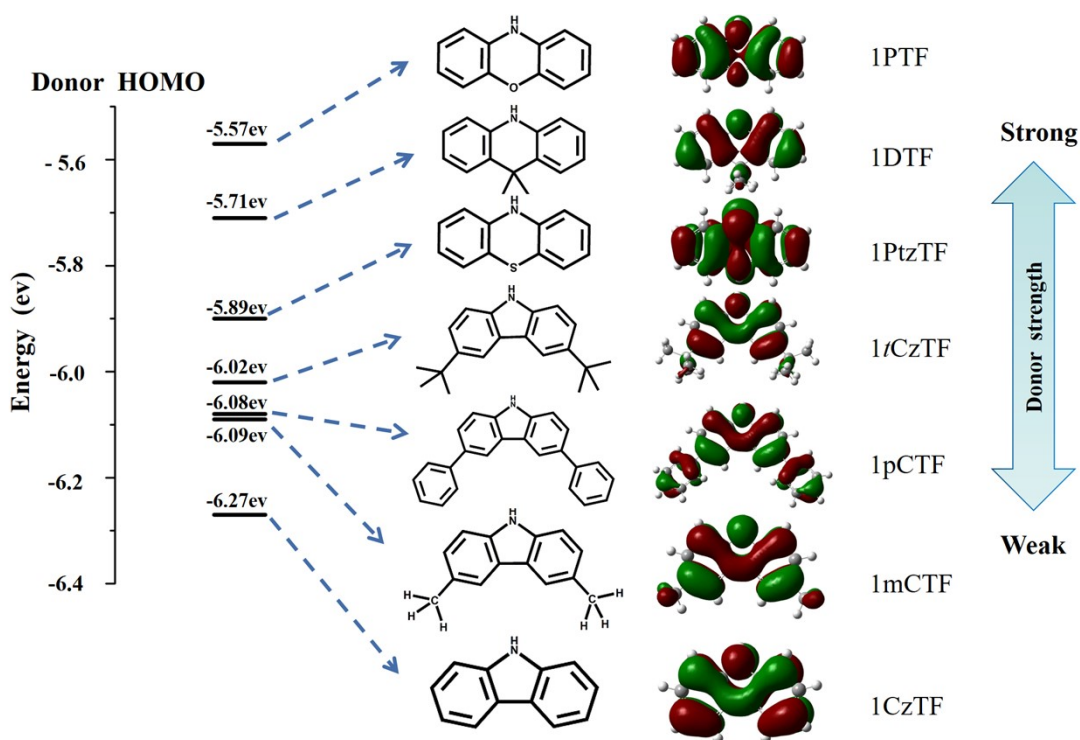

Figure S1. The energy of highest occupied molecular orbital for donor units.

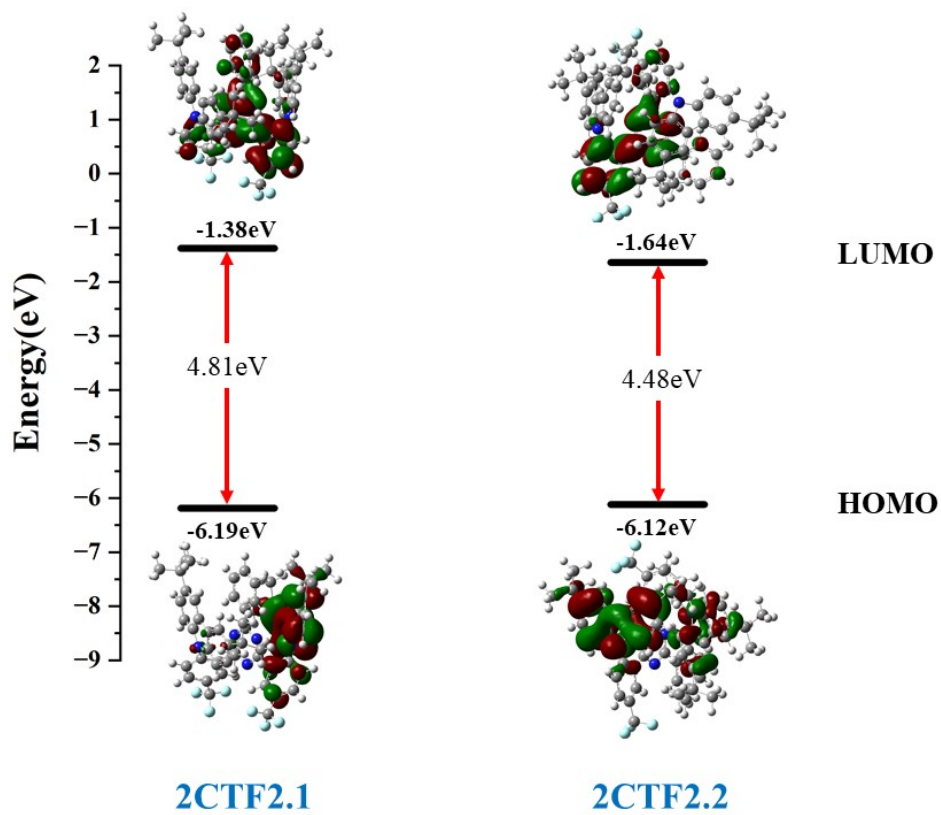

Figure S2. Calculated distributions and energies of HOMO and LUMO for 2CTF2.1 and 2CTF2.2.

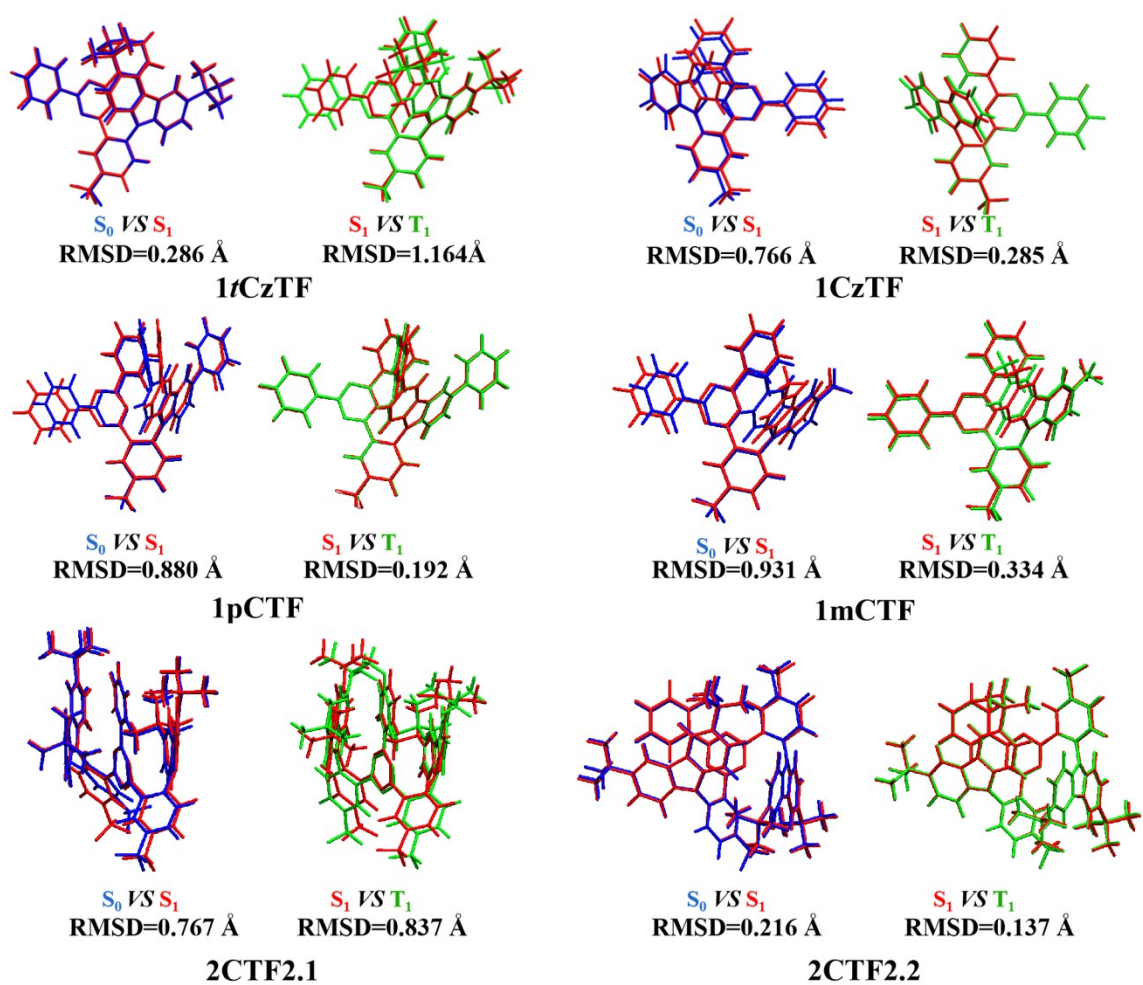

Figure S3. Geometry comparisons and RMSD values of molecules with carbazole rings in different states in toluene.

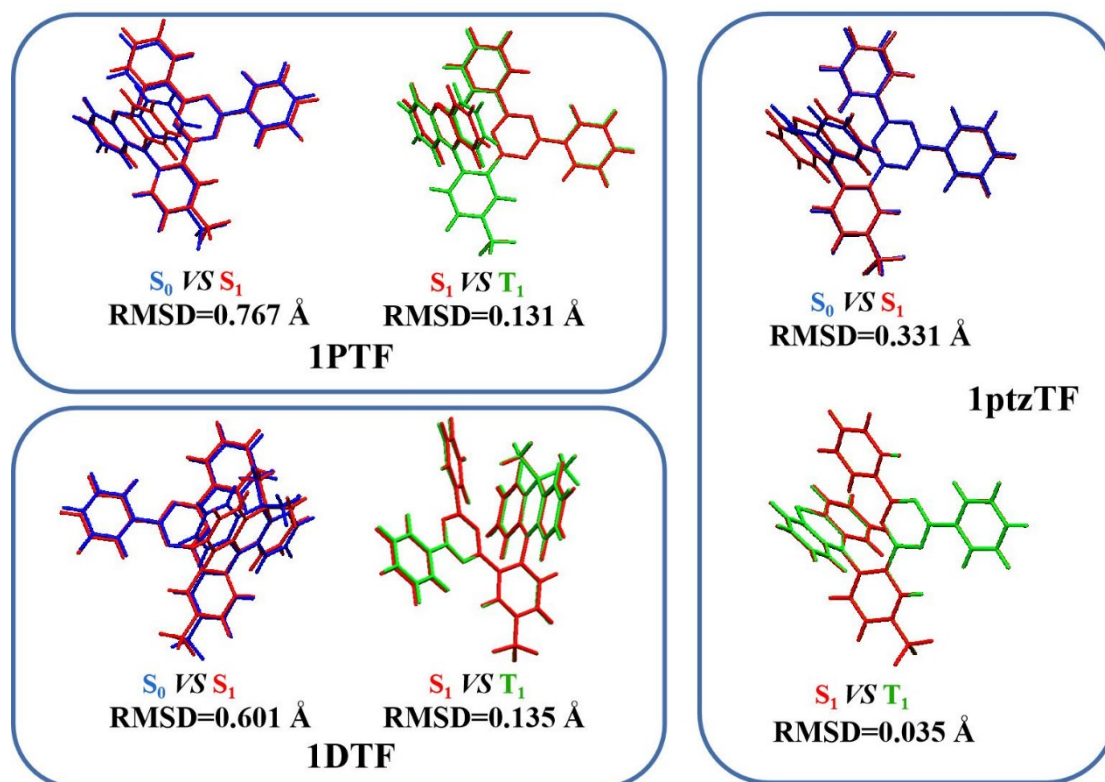

Figure S4. Geometry comparisons and RMSD values of molecules with phenazine rings in different states in toluene.

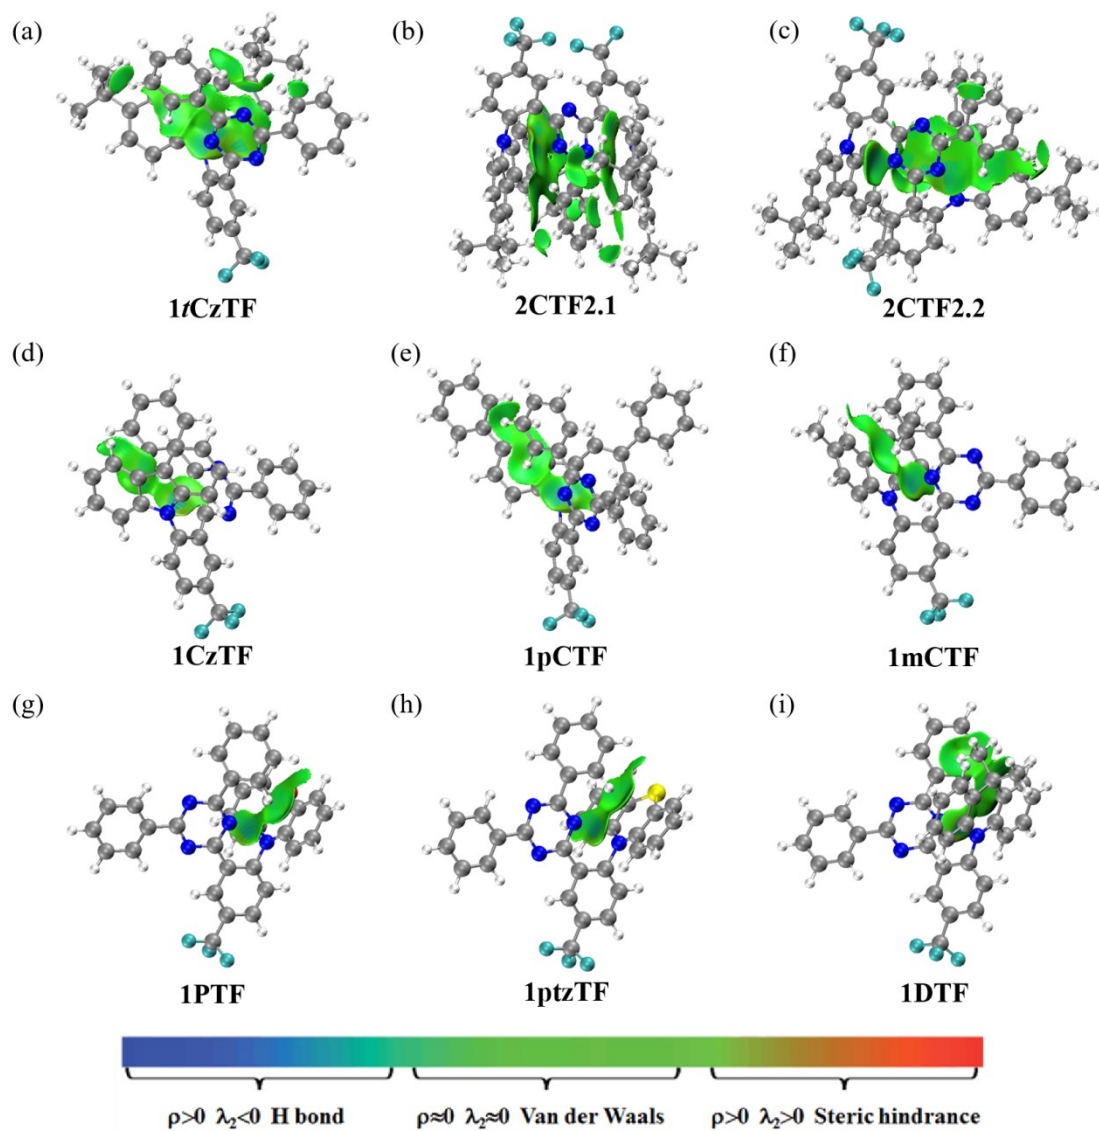

Figure S5. Inter-fragment intramolecular interactions for studied molecules measured by IGMH method. (Iso-surface values are all 0.005).

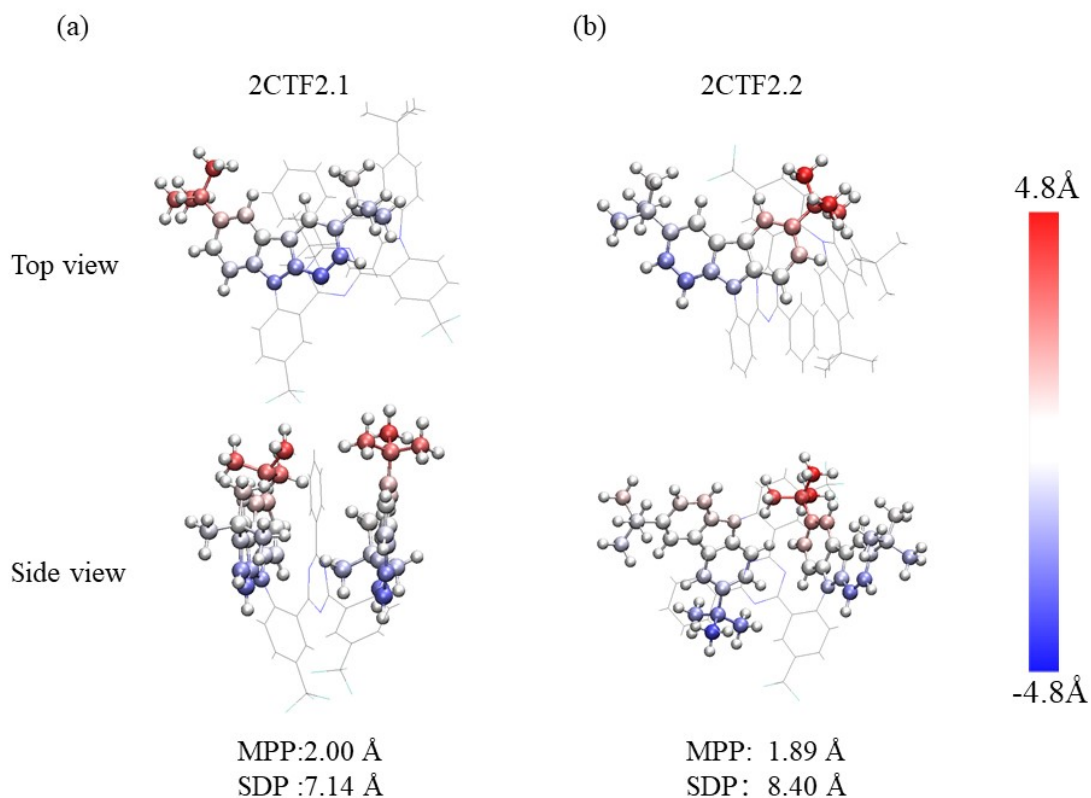

Figure S6. Molecular planarity parameters of donors for 2CTF2.1 (a) and 2CTF2.2 (b).

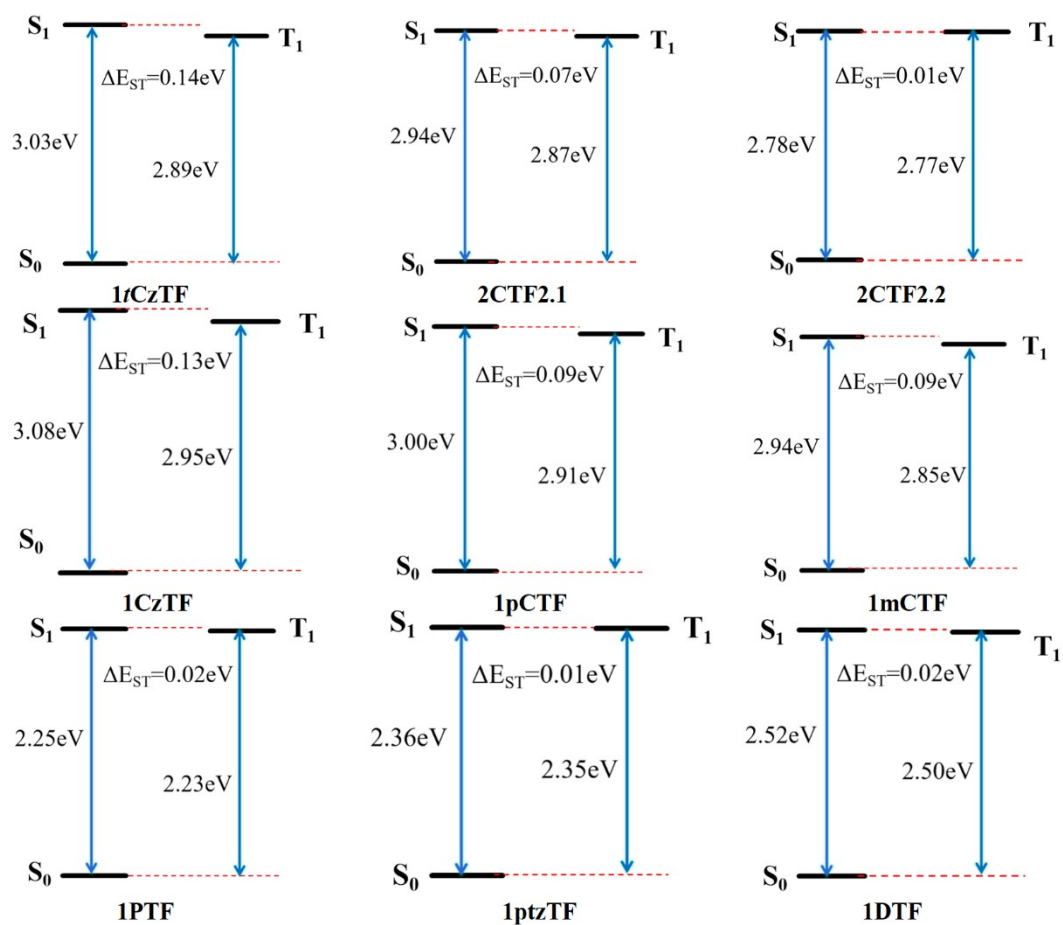

Figure S7. Adiabatic excitation energies for  $S_1$  states and  $T_1$  states as well as their energy gaps for all studied molecules.

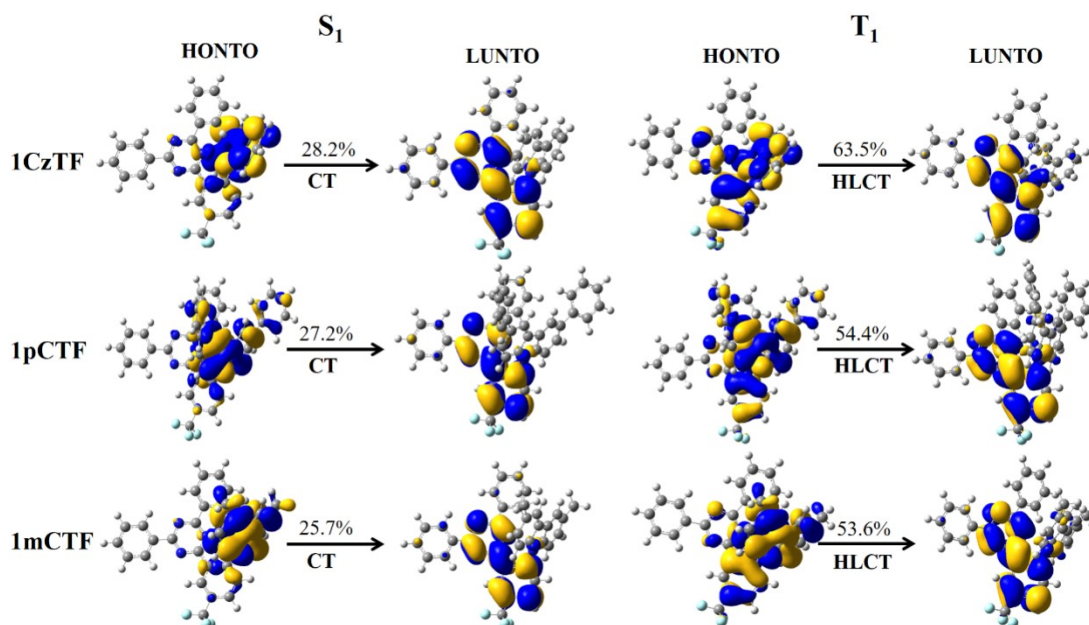

Figure S8. Natural transition orbitals (NTOs) of the  $S_1$  and  $T_1$  states for 1CzTF, 1pCzTF and 1mCTF in toluene. The values above the arrows are the LE proportions in excitation. (Iso-value=0.02)

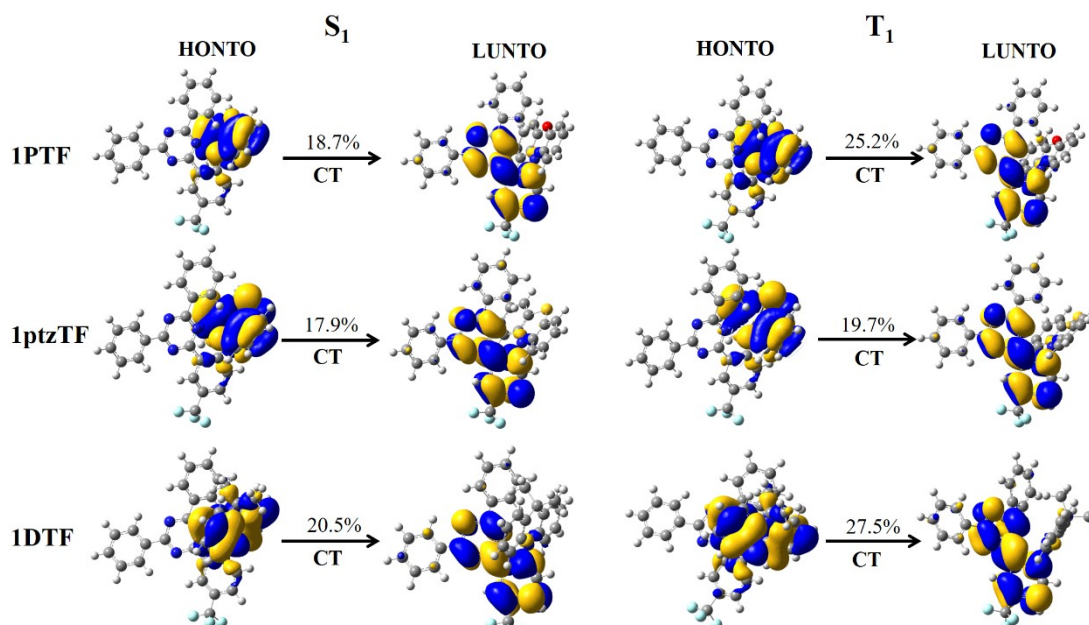

Figure S9. Natural transition orbitals (NTOs) of the  $S_1$  and  $T_1$  states for 1PTF, 1ptzTF and 1DTF in toluene. The values above the arrows are the LE proportions in excitation. (Iso-value=0.02)

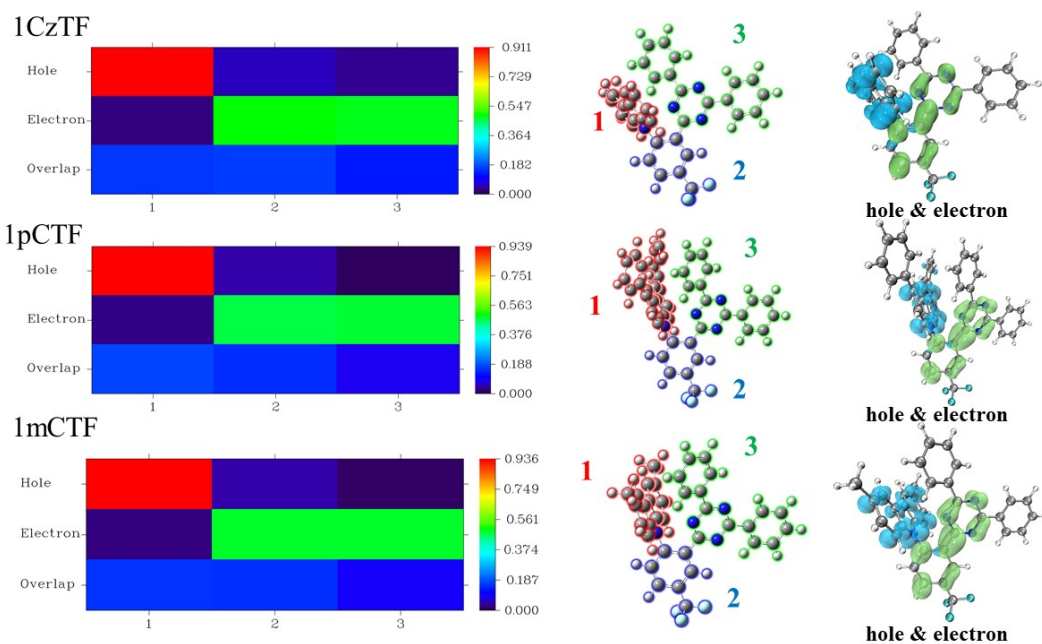

Figure S10. Heat maps and distributions of hole and electron in  $S_1$  state for 1CzTF, 1pCTF and 1mCTF. (Iso-value = 0.002)

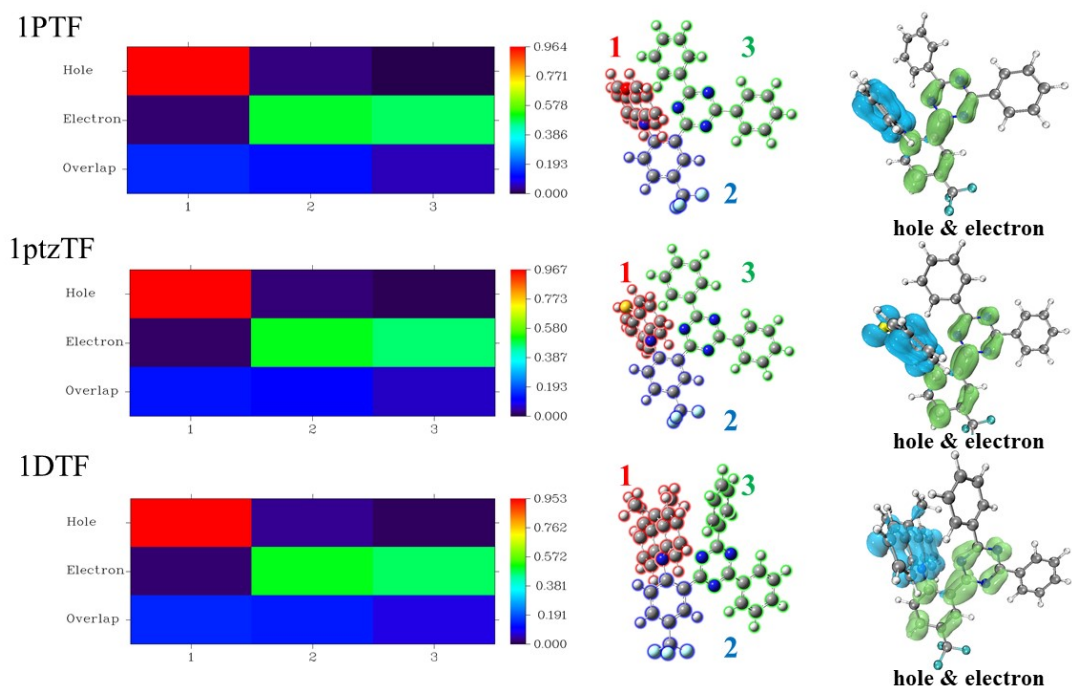

Figure S11. Heat maps and distributions of hole and electron in  $S_1$  state for 1PTF, 1ptzTF and 1DTF. (Iso-value = 0.002)



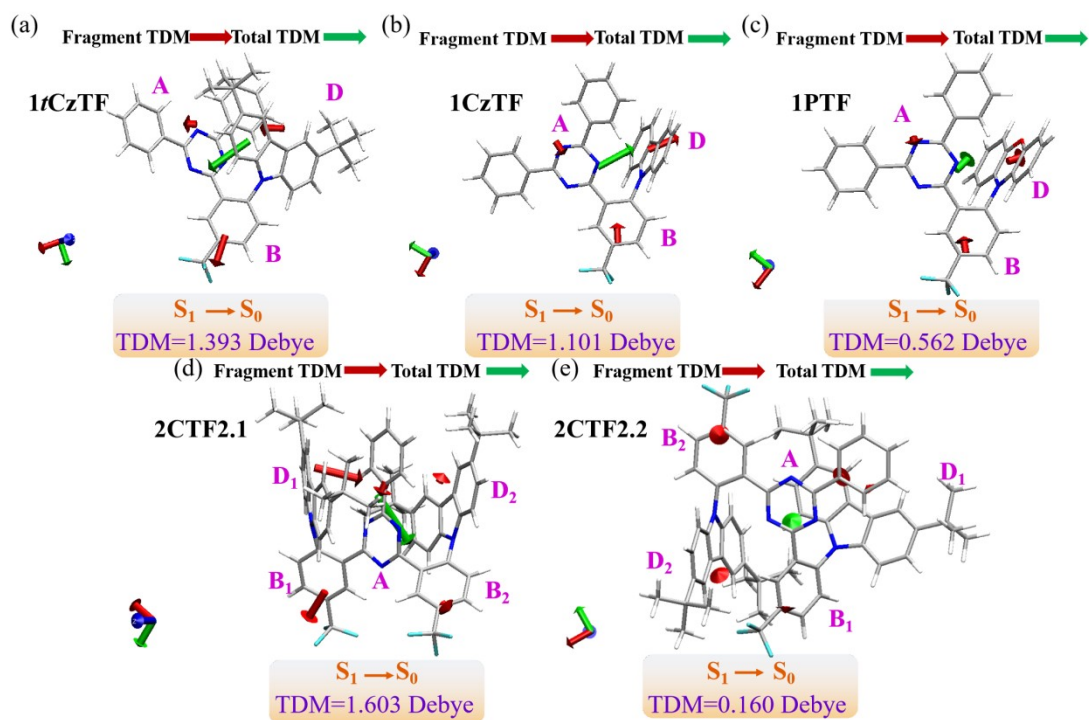

Figure S12. Transition dipole moment vector contributions from different fragments (red) and the whole molecules (green) for 1tCzTF (a), 1CzTF (b), 1PTF (c), 2CTF2.1 (d), and 2CTF2.2 (e), respectively.

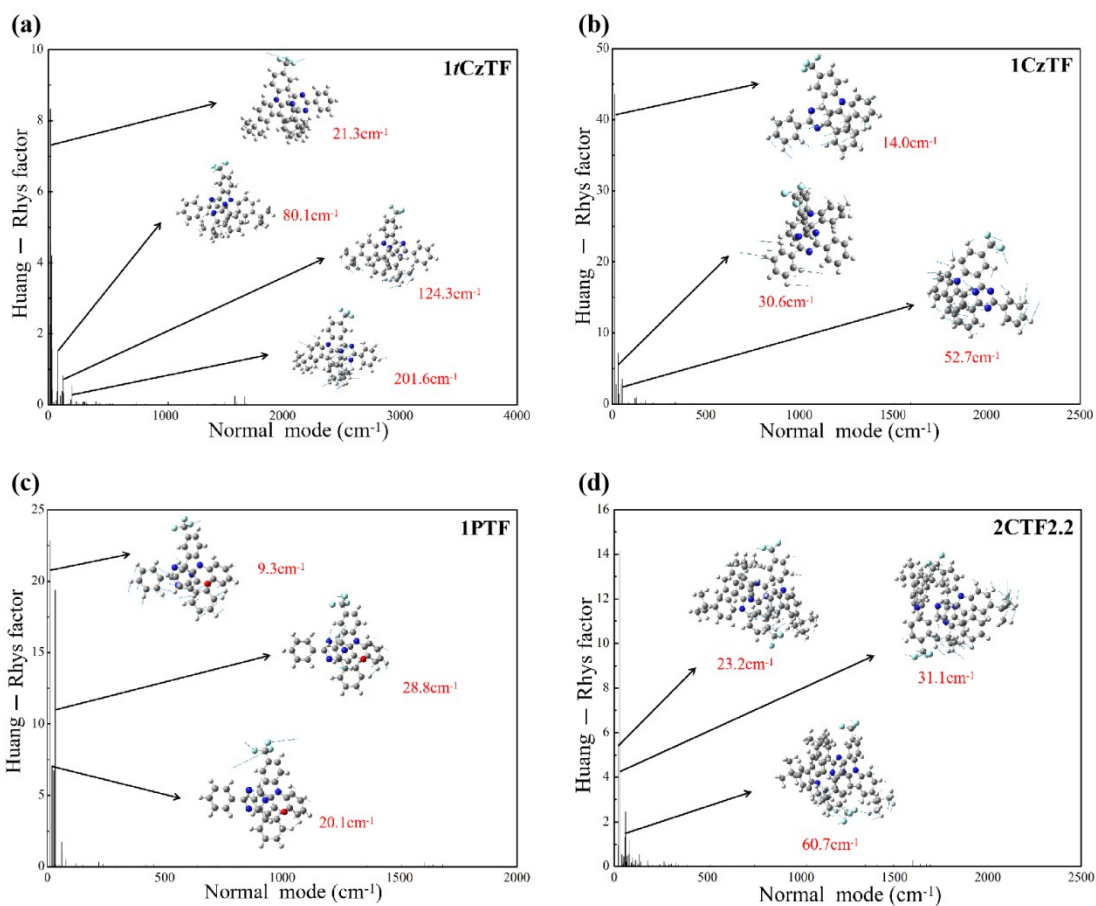

Figure S13. Calculated HR factors versus the normal-mode frequencies for 1tCzTF (a), 1CzTF (b), 1PTF (c) and 2CTF2.2 (d) and representative vibration modes are shown as insets.

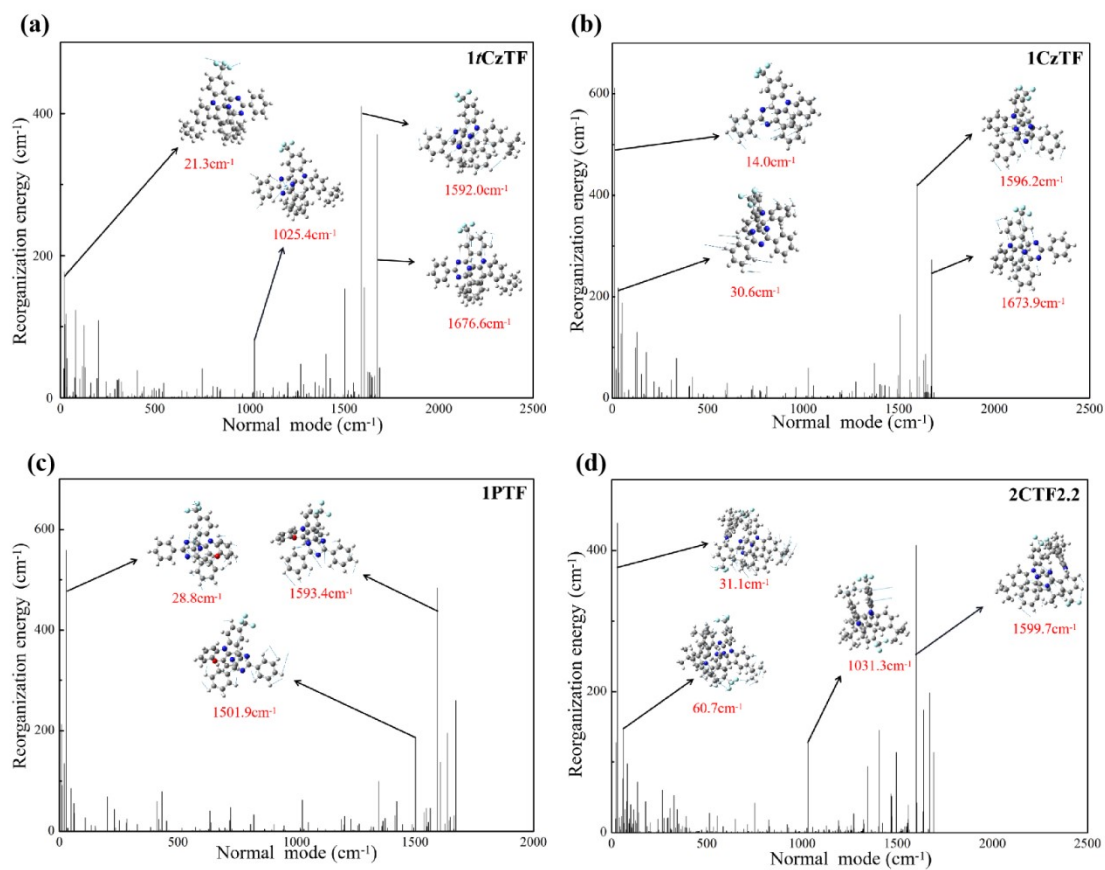

Figure S14. Calculated reorganization energies versus the normal-mode frequencies for 1tCzTF (a), 1CzTF (b), 1PTF (c) and 2CTF2.2 (d) and representative vibration modes are shown as insets.

Table S1. Calculated results of GCDA. Where d represents the charge transfer amount from donors to acceptors and bridges, b represents the charge transfer amount from acceptors and bridges to donors. d-b represents the net charge transfer calculated with GCDA.

| Molecule | d     | b     | d-b   |
|----------|-------|-------|-------|
| 1tCzTF   | 0.167 | 0.027 | 0.140 |
| 1CzTF    | 0.154 | 0.007 | 0.147 |
| 1pCTF    | 0.157 | 0.012 | 0.145 |
| 1mCTF    | 0.156 | 0.008 | 0.148 |
| 1PTF     | 0.158 | 0.001 | 0.157 |
| 1ptzTF   | 0.157 | 0.006 | 0.151 |
| 1DFT     | 0.158 | 0.013 | 0.145 |

Table S2. Energies of HOMO and LUMO,  $\epsilon_{\text{gap}}$  represents HOMO-LUMO energy gap.

| Molecule | HOMO (eV) | LUMO (eV) | $\epsilon_{\text{gap}}$ (eV) |
|----------|-----------|-----------|------------------------------|
| 1tCzTF   | -6.14     | -1.33     | 4.81                         |
| 1CzTF    | -6.34     | -1.35     | 4.99                         |
| 1pCTF    | -6.13     | -1.34     | 4.79                         |
| 1mCTF    | -6.15     | -1.31     | 4.84                         |
| 1PTF     | -5.66     | -1.38     | 4.28                         |
| 1ptzTF   | -5.88     | -1.62     | 4.26                         |
| 1DFT     | -5.78     | -1.33     | 4.45                         |
| 2CTF2.1  | -6.19     | -1.38     | 4.81                         |
| 2CTF2.2  | -6.12     | -1.64     | 4.48                         |

Table S3. Transition dipole moment (Debye) contribution from different fragments for 1tCzTF, 1CzTF, 1PTF, 2CTF2.1 and 2CTF2.2.

|         |                | Transition dipole moment |         |          |                |
|---------|----------------|--------------------------|---------|----------|----------------|
|         | Fragment       | X (a.u.)                 | Y(a.u.) | Z (a.u.) | Total* (Debye) |
| 1tCzTF  | D              | 0.175                    | -0.077  | -0.152   | 0.621          |
|         | B              | 0.213                    | 0.274   | -0.031   | 0.886          |
|         | A              | 0.074                    | -0.034  | -0.063   | 0.262          |
|         | All            | 0.462                    | 0.163   | -0.246   | 1.393          |
| 1CzTF   | D              | -0.275                   | -0.212  | 0.087    | 0.910          |
|         | B              | -0.161                   | 0.104   | 0.033    | 0.494          |
|         | A              | 0.065                    | -0.125  | 0.013    | 0.360          |
|         | All            | -0.340                   | -0.233  | 0.133    | 1.101          |
| 1PTF    | D              | -0.118                   | -0.093  | 0.077    | 0.429          |
|         | B              | -0.094                   | 0.093   | 0.042    | 0.353          |
|         | A              | 0.032                    | -0.041  | 0.001    | 0.132          |
|         | All            | -0.181                   | -0.041  | 0.120    | 0.562          |
| 2CTF2.1 | D <sub>1</sub> | -0.361                   | -0.114  | -0.323   | 1.265          |
|         | D <sub>2</sub> | 0.002                    | -0.051  | 0.001    | 0.130          |
|         | B <sub>1</sub> | -0.036                   | 0.374   | -0.041   | 0.961          |
|         | B <sub>2</sub> | -0.068                   | 0.004   | 0.000    | 0.173          |
|         | A              | -0.020                   | 0.103   | 0.003    | 0.267          |
|         | All            | -0.411                   | 0.316   | -0.359   | 1.603          |
| 2CTF2.2 | D <sub>1</sub> | 0.002                    | 0.013   | -0.031   | 0.086          |
|         | D <sub>2</sub> | 0.002                    | 0.036   | -0.036   | 0.130          |
|         | B <sub>1</sub> | 0.006                    | -0.009  | 0.000    | 0.027          |
|         | B <sub>2</sub> | 0.002                    | -0.007  | -0.026   | 0.069          |
|         | A              | -0.010                   | 0.001   | 0.010    | 0.036          |
|         | All            | 0.002                    | 0.034   | -0.053   | 0.160          |

\*  $Total = \sqrt{x^2 + y^2 + z^2} \times 2.5417 \text{ Debye/a.u.}$
